# Supplementary material for: Single-step ball milling synthesis of highly Li+ conductive Li5.3PS4.3ClBr0.7 glass ceramic electrolyte enables low-impedance all-solid-state batteries
Source: Royal Society of Chemistry journal article supplement (doi:10.1039/d1ma00784j), 2021-01-01
Supplement: d1ma00784j1.pdf [file d1ma00784j1.pdf]

## Supporting Information for:

# Single-step ball milling synthesis of highly Li<sup>+</sup> conductive Li<sub>5.3</sub>PS<sub>4.3</sub>ClBr<sub>0.7</sub> glass ceramic electrolyte enables low-impedance all-solid-state batteries

Marvin Cronau, Marvin Szabo, and Bernhard Roling

### Synthesis of GC-Li<sub>5.3</sub>PS<sub>4.3</sub>ClBr<sub>0.7</sub>

The electrolyte was synthesized by using a high-energy planetary ball mill (Pulverisette 7, Fritsch). A stoichiometric mixture of reagent grade Li<sub>2</sub>S (99.9%, Alfa Aesar), P<sub>2</sub>S<sub>5</sub> (99%, Merch-Millipore), LiCl (99.9%, Sigma Aldrich), LiBr (99.9%, Sigma Aldrich) powders was filled in a zirconia pot (20 ml volume) with 10 zirconia balls ( $\varnothing = 10$  mm) in an Ar-filled glovebox. A rotational speed of 850 rpm for 8.25 hours (5 min milling; 15 min rest; 99 cycles) was used. The resulting powder was ground in an agate mortar.

### Ionic conductivity measurements

105 mg of the electrolyte were filled into a CompreDrive Measurements Cell inside an Ar-filled glovebox. The cell was then placed inside the CompreDrive (rhd Instruments), and a fabrication pressure of 400 MPa was applied for 120 seconds. The pressure was released, the cell equipped with a heating case and a pressure of 100 MPa applied. The measurements were carried out using a potentiostat/galvanostat AUTOLAB PGSTAT302N (Metrohm Autolab, Utrecht, Netherlands). The impedance spectra were taken in a frequency range from 10<sup>5</sup>-10<sup>1</sup> Hz with an applied rms AC voltage of 10 mV. The temperature was varied in 5°C increments between 30 and 85°C. The sample thickness of the pellet was measured with a micrometer screw gauge (Mitutoyo). The impedance spectra were analyzed with the RelaxIS software package (rhd Instruments).

### SEM images

SEM images were taken using a Gemini II (Zeiss, Germany) and an accelerating voltage of 2 kV.

### X-ray powder diffraction

X-ray powder diffraction data were collected using an STOE StadiMP diffractometer, equipped with a Mythen 1 K silicon strip detector and a Cu K $\alpha$  X-ray source ( $\lambda = 1.54056$  Å). The powder was filled inside a quartz vessel and sealed under argon. The data were collected using the Debye-Scherrer geometry. Crystallite sizes  $L$  were determined by using the Scherrer equation  $L = \frac{K\lambda}{\Delta 2\theta \cdot \cos\theta}$  (wavelength  $\lambda$ ; correction factor  $K = 0.89$ ;  $\Delta 2\theta = \frac{\text{Half width}}{360^\circ} \cdot 2\pi$ ).

## Preparation of electrode composites

The cathode composite powder consisting of  $\text{LiNbO}_3@\text{LCO}$ ,  $\text{GC-Li}_{5.3}\text{PS}_{4.3}\text{ClBr}_{0.7}$  /  $\text{GC-Li}_6\text{PS}_5\text{Cl}$  and carbon fibers was prepared by mixing the three powders using a high-energy planetary ball mill (Pulverisette 7, Fritsch) with a weight ratio of 70:30:3. A rotational speed of 200 rpm for 1 hour (30 min milling; 5 min rest; 2 cycles) was used.

## Electrochemical characterization

For the electrochemical testing, a self-built cell setup ( $\varnothing = 10$  mm) was used. First 80 mg of the electrolyte were filled in the cell and compacted at 200 MPa for 2 minutes. After this 15 mg of the cathode were dispensed onto one side of the electrolyte layer. The cell was compacted at 300 MPa for 2 minutes. Last an indium foil ( $\varnothing = 10$  mm), which was used as an anode, was applied at 300 MPa onto the other side of the electrolyte. The electrochemical measurements were performed using a BioLogic SP-150. The cycling experiments were carried out at 0.1 C, 98 MPa, ambient temperature (25 °C) between 3.7 V and 2.1 V. The impedance spectra were taken in a frequency range from  $10^5$ - $10^{-3}$  Hz with an applied rms AC voltage of 10 mV.

## Results

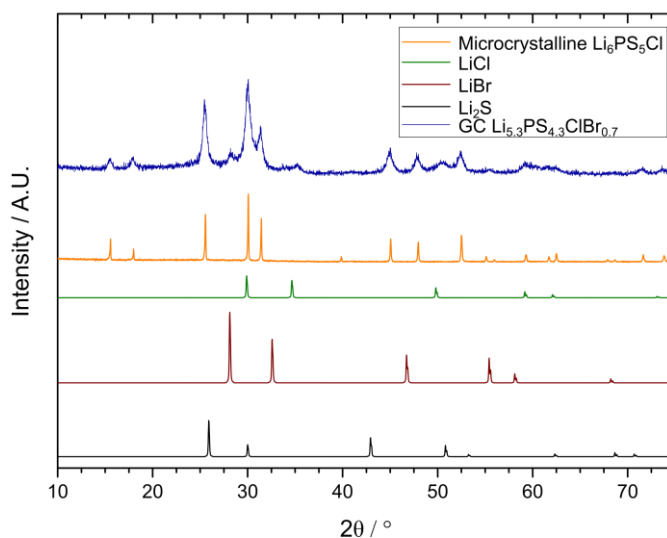

Fig S1. XRD pattern of  $\text{GC Li}_{5.3}\text{PS}_{4.3}\text{ClBr}_{0.7}$  and reference patterns of  $\text{Li}_6\text{PS}_5\text{Cl}$ ,  $\text{LiCl}$ ,  $\text{LiBr}$  and  $\text{Li}_2\text{S}$ .

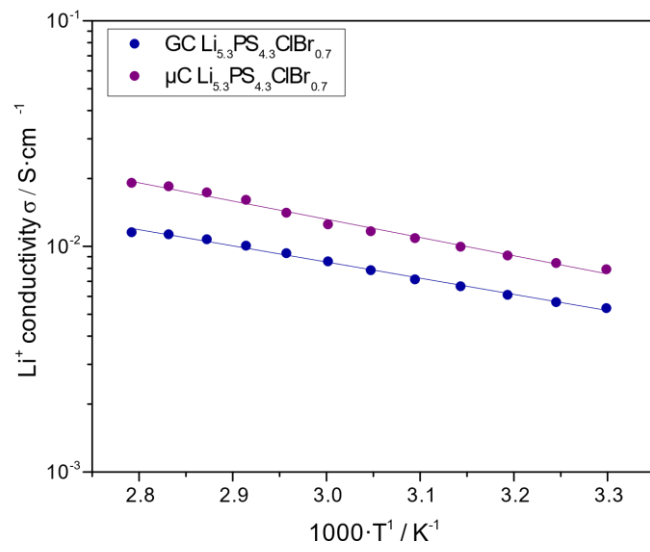

Fig S2. Arrhenius plot of the ionic conductivity of GC Li<sub>5.3</sub>PS<sub>4.3</sub>ClBr<sub>0.7</sub> and  $\mu$ C Li<sub>5.3</sub>PS<sub>4.3</sub>ClBr<sub>0.7</sub>.

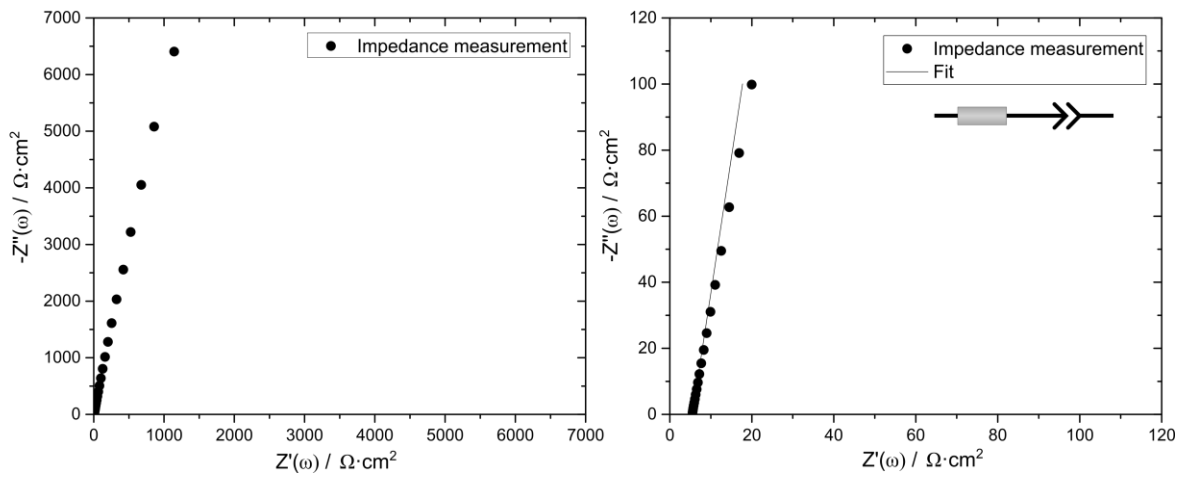

Fig S3. Exemplary impedance Nyquist plot of  $\mu$ C Li<sub>5.3</sub>PS<sub>4.3</sub>ClBr<sub>0.7</sub> at 30°C (left)  
and zoom into the high-frequency regime (right)

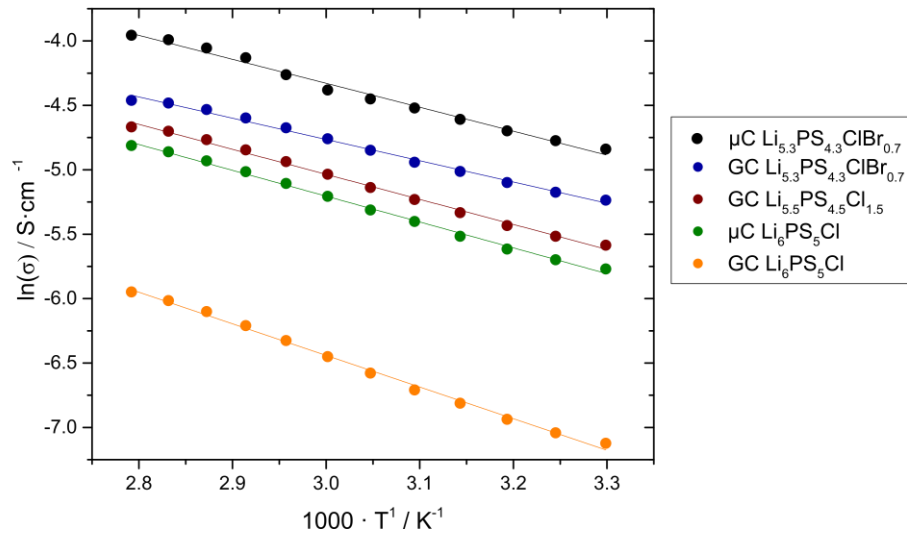

Fig S4. Arrhenius plots of the ionic conductivity of the solid electrolytes.

Table S1: Activation energies and ionic conductivities of the different solid electrolytes at 25°C and at 20°C, respectively.

| Sample                                                     | $E_A / \text{eV}$ | $\sigma_{25^\circ\text{C}} / \text{mS} \cdot \text{cm}^{-1}$ | $\sigma_{20^\circ\text{C}} / \text{mS} \cdot \text{cm}^{-1}$ |
|------------------------------------------------------------|-------------------|--------------------------------------------------------------|--------------------------------------------------------------|
| GC Li <sub>5.5</sub> PS <sub>4.5</sub> Cl <sub>1.5</sub>   | 0.16              | 3.2                                                          | 2.9                                                          |
| GC Li <sub>6</sub> PS <sub>5</sub> Cl                      | 0.20              | 0.67                                                         | 0.58                                                         |
| μC Li <sub>6</sub> PS <sub>5</sub> Cl                      | 0.16              | 2.7                                                          | 2.4                                                          |
| GC Li <sub>5.3</sub> PS <sub>4.3</sub> ClBr <sub>0.7</sub> | 0.13              | 4.8                                                          | 4.3                                                          |
| μC Li <sub>5.3</sub> PS <sub>4.3</sub> ClBr <sub>0.7</sub> | 0.15              | 6.8                                                          | 6.1                                                          |
